# Supplementary material
Source: PubMed Central journal article supplement (PMC4725378)
Supplement: supp_civ897_civ897supp.pdf [file supp_civ897_civ897supp.pdf]

**SUPPLEMENT TO:**

**Six-week Combination Directly Acting Anti-HCV Therapy Induces Moderate Rates of Sustained Virologic Response in Patients with Advanced Liver Disease**

<sup>1</sup>Sarah Kattakuzhy M.D., <sup>1</sup>Eleanor Wilson, M.D., <sup>2</sup>Sreetha Sidharthan B.S.; <sup>2</sup>Zayani Sims B.S.,  
<sup>3</sup>Mary McLaughlin, R.N.; <sup>1</sup>Angie Price, C.R.NP; <sup>1</sup>Rachel Silk R.N.; <sup>1</sup>Chloe Gross R.N.;  
<sup>1</sup>Elizabeth Akoth R.N.; <sup>4</sup>Maryellen McManus, R.N; <sup>1</sup>Benjamin Emmanuel, M.S.; <sup>1</sup>Shikha  
Shrivastava, Ph.D; <sup>1</sup>Lydia Tang; <sup>5</sup>Gebeyehu Teferi M.D.; <sup>5</sup>Jose Chavez M.D.; <sup>6</sup>Brian Lam, P.A.;  
<sup>7</sup>Hongmei Mo, M.D.; <sup>7</sup>Anuoluwapo Osinusi M.D.; <sup>8</sup>Michael A. Polis M.D.; <sup>2</sup>Henry Masur M.D.;  
<sup>9</sup>Anita Kohli M.D.; <sup>1</sup>Shyamasundaran Kottlil M.D., Ph.D.

## **Contents**

**Figure S1:** Percent of Patients with HCV Viral Load Below LLOQ by Abbott Assay

**Table S1:** Baseline HCV Resistance Mutations in Patients Treated With Sofosbuvir + Ledipasvir + GS-9451 for 6 weeks (A) Treatment naïve patients with advanced liver disease (B) Treatment-experienced patients with advanced liver disease

**Appendix:** Enrollment Criteria

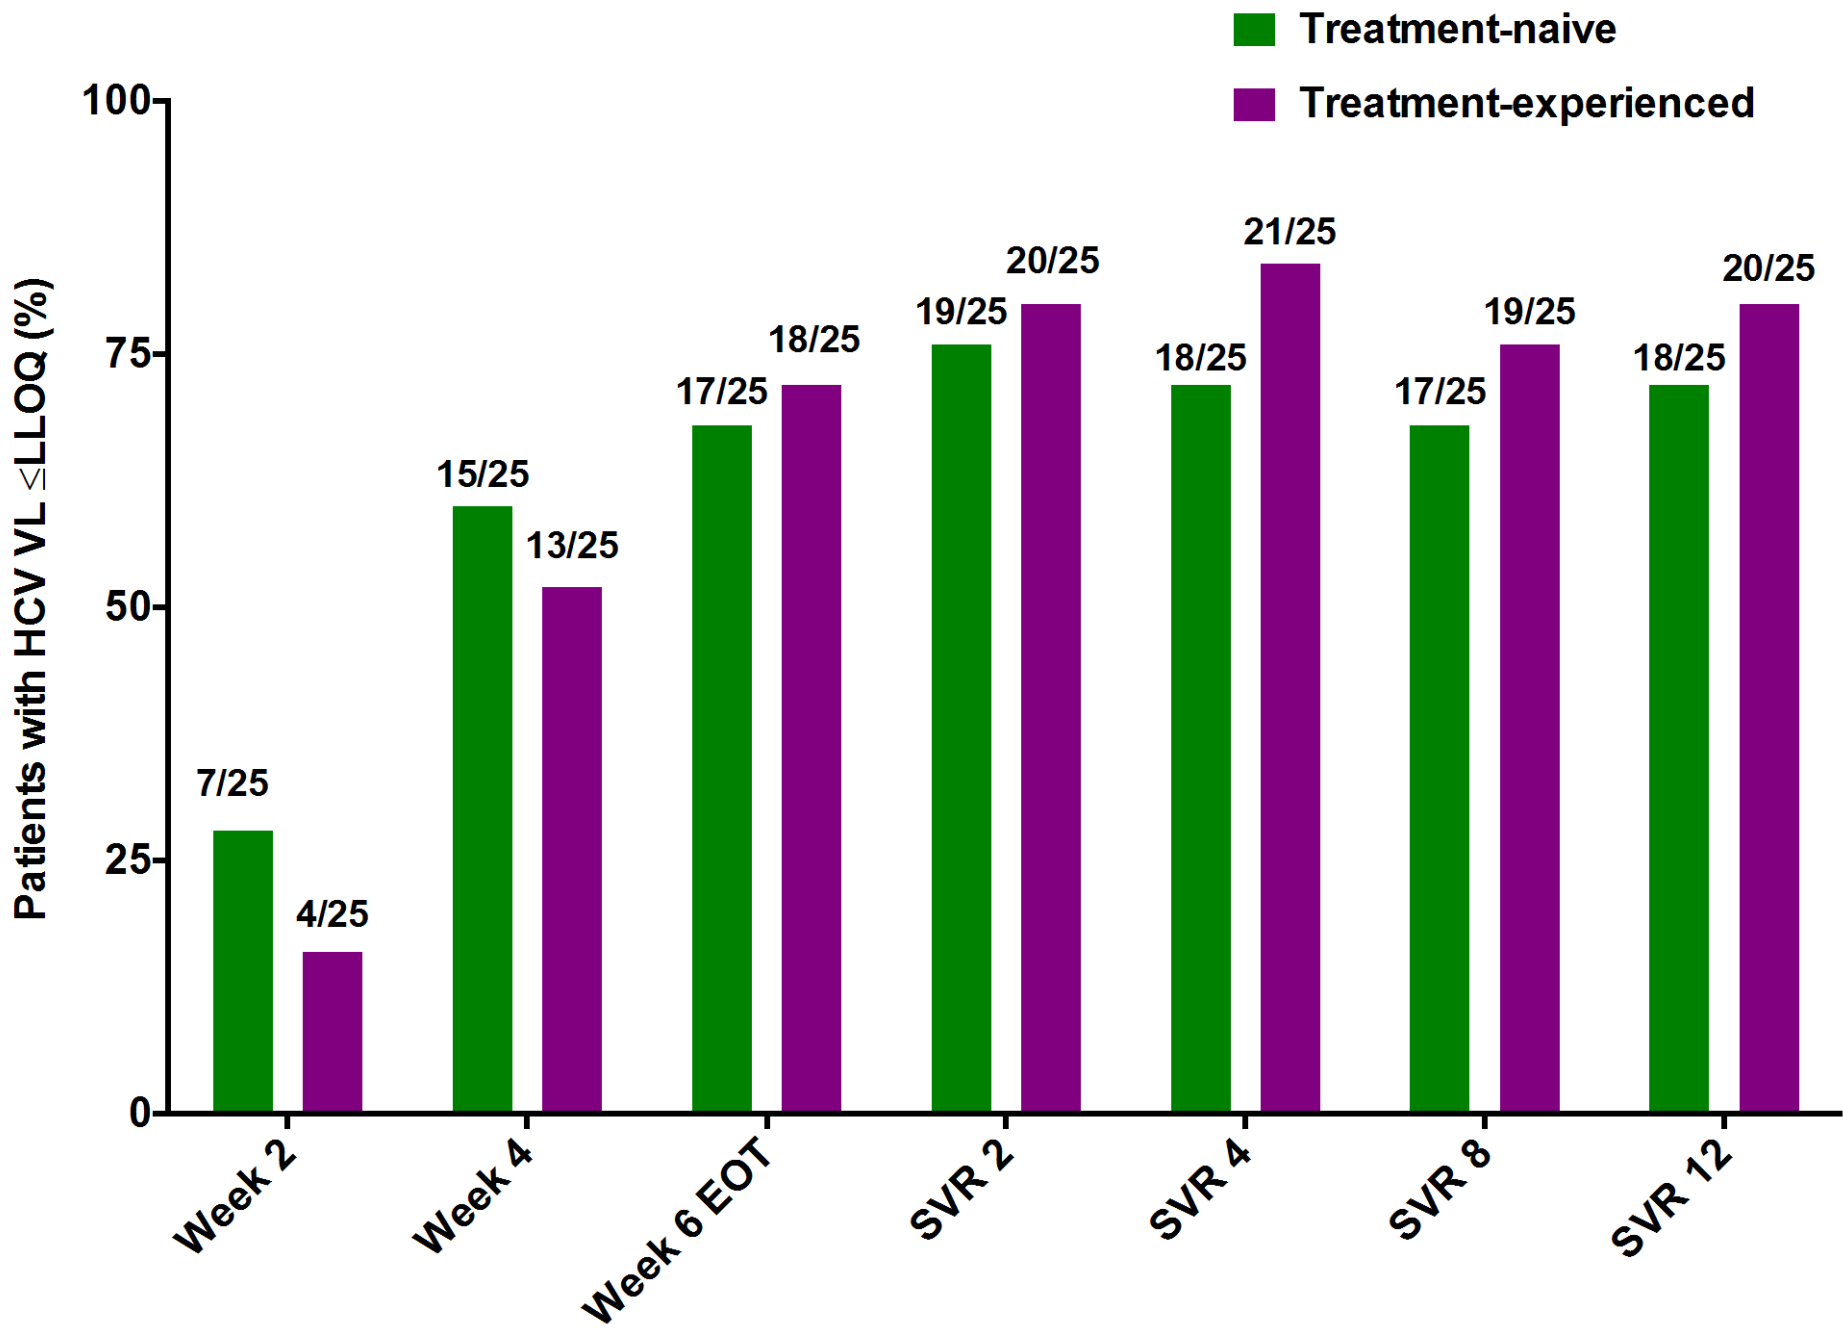

**(A) Treatment Naïve Patients with Advanced Liver Disease Treated with Sofosbuvir + Ledipasvir + GS-9451**

| Patient | GT | NS3/4 Baseline             |             | NS3/4 at Relapse      |             | NS5A Baseline         |             | NS5A at Relapse              |             | NS5B Baseline         |             | NS5B at Relapse       |             |
|---------|----|----------------------------|-------------|-----------------------|-------------|-----------------------|-------------|------------------------------|-------------|-----------------------|-------------|-----------------------|-------------|
|         |    | Mutant (% population)      | Fold change | Mutant (% population) | Fold change | Mutant (% population) | Fold change | Mutant (% population)        | Fold change | Mutant (% population) | Fold change | Mutant (% population) | Fold change |
| 1       | 1a | T54A (>99%)<br>Q80K (>99%) | 3 to 5      |                       |             | None                  |             |                              |             | None                  |             |                       |             |
| 2       | 1a | None                       |             | None                  |             | L31M (57.96%)         | 554         | L31M (>99%)                  | 554         | None                  |             | None                  |             |
| 3       | 1b | None                       |             | None                  |             | None                  |             | None                         |             | None                  |             | None                  |             |
| 4       | 1b | None                       |             |                       |             | None                  |             |                              |             | None                  |             |                       |             |
| 5       | 1a | None                       |             |                       |             | Q30H (>99%)           | 183         |                              |             | None                  |             |                       |             |
| 6       | 1b | None                       |             |                       |             | None                  |             |                              |             | None                  |             |                       |             |
| 7       | 1b | None                       |             |                       |             | L31M (35.14%)         |             |                              |             | None                  |             |                       |             |
| 8       | 1a | None                       |             | None                  |             | None                  |             | None                         |             | None                  |             | None                  |             |
| 9       | 1a | None                       |             |                       |             | None                  |             |                              |             | None                  |             |                       |             |
| 10      | 1a | Q80L (1.76%)               | 3 to 5      | None                  |             | None                  |             | None                         |             | None                  |             | None                  |             |
| 11      | 1a | Q80K (>99%)                | 3 to 5      | None                  |             | None                  |             | None                         | ----        | None                  |             | None                  | ----        |
| 12      | 1a | Q80K (88.45%)              | 3 to 5      |                       |             | H58D (10.11%)         | >1000       |                              |             | None                  |             |                       |             |
| 13      | 1a | Q80K (>99%)                | 3 to 5      |                       |             | None                  |             |                              |             | None                  |             |                       |             |
| 14      | 1b | None                       |             |                       |             | None                  |             |                              |             | None                  |             |                       |             |
| 15      | 1b | None                       |             |                       |             | L31M (>99%)           | 12          |                              |             | None                  |             |                       |             |
| 16      | 1a | None                       |             |                       |             | None                  |             |                              |             | None                  |             |                       |             |
| 17      | 1b | Q80L (>99%)                | 3 to 5      |                       |             | L31M (13.61%)         | 12          |                              |             | None                  |             |                       |             |
| 18      | 1a | Q80K (>99%)                | 3 to 5      |                       |             | None                  |             |                              |             | None                  |             |                       |             |
| 19      | 1b | None                       |             |                       |             | None                  |             |                              |             | None                  |             |                       |             |
| 20      | 1a | None                       |             |                       |             | None                  |             |                              |             | None                  |             |                       |             |
| 21      | 1a | None                       |             | None                  |             | None                  |             | Q30R (1.82%)<br>Y93C (4.31%) | >1000       | None                  |             | None                  |             |
| 22      | 1a | None                       |             |                       |             | None                  |             |                              |             | None                  |             |                       |             |
| 23      | 1b | None                       |             |                       |             | None                  |             |                              |             | None                  |             |                       |             |
| 24      | 1a | None                       |             |                       |             | None                  |             |                              |             | None                  |             |                       |             |
| 25*     | 1a | Q80K (>99%)                | 3 to 5      | LTF                   |             | None                  |             | LTF                          |             | None                  |             | LTF                   |             |

There was no FTN 19, so 19=FTN20, so on.

\*Patient was lost to follow up after week 8 and SVR vs. viral relapse could not be assessed

**(B) Treatment-experienced Patients with Advanced Liver Disease and received 6 weeks of Sofosbuvir + Ledipasvir + GS-9451**

| Patient | GT | NS3/4 Baseline        |             | NS3/4 at Relapse      |             | NS5A Baseline         |             | NS5A at Relapse                                                            |             | NS5B Baseline         |    | NS5B at Relapse       |             |
|---------|----|-----------------------|-------------|-----------------------|-------------|-----------------------|-------------|----------------------------------------------------------------------------|-------------|-----------------------|----|-----------------------|-------------|
|         |    | Mutant (% population) | Fold change | Mutant (% population) | Fold change | Mutant (% population) | Fold change | Mutant(% population)                                                       | Fold change | Mutant (% population) | FC | Mutant (% population) | Fold change |
| 1       | 1a | Q80K (84.4%)          | 3 to 5      |                       |             | None                  |             |                                                                            |             | None                  |    |                       |             |
| 2       | 1a | Q80K (>99%)           | 3 to 5      |                       |             | None                  |             |                                                                            |             | None                  |    |                       |             |
| 3       | 1a | None                  |             | None                  |             | L31M (>99%)           | 554         | L31M (>99%)                                                                | 554         | None                  |    | None                  |             |
| 4       | 1a | None                  |             |                       |             | None                  |             |                                                                            |             | None                  |    |                       |             |
| 5       | 1b | Q80L (>99%)           | 3 to 5      |                       |             | Y93H (36.25%)         | >1000       |                                                                            |             | None                  |    |                       |             |
| 6       | 1a | Q80L (>99%)           | 3 to 5      |                       |             | None                  |             |                                                                            |             | None                  |    |                       |             |
| 7       | 1a | None                  |             |                       |             | Q30L (31.43%)<br>Y93H | >1000       |                                                                            |             | None                  |    |                       |             |
| 8       | 1a | None                  |             |                       |             | None                  |             |                                                                            |             | None                  |    |                       |             |
| 9       | 1a | R155K (5.19%)         | >100        |                       |             | None                  |             |                                                                            |             | None                  |    |                       |             |
| 10      | 1a | None                  |             | None                  |             | None                  |             | None                                                                       |             | None                  |    | None                  |             |
| 11      | 1a | None                  |             |                       |             | None                  |             |                                                                            |             | None                  |    |                       |             |
| 12      | 1a | None                  |             | None                  |             | None                  |             | Q30R (7.4%)<br>Q30E (15.8%)<br>L31V (29.5%)<br>L31M (37.0%)<br>H58D (7.6%) | >1000       | None                  |    | None                  |             |
| 13      | 1a | Q80K (>99%)           | 3 to 5      |                       |             | None                  |             |                                                                            |             | None                  |    |                       |             |
| 14      | 1a | None                  |             | None                  |             | None                  |             | None                                                                       |             | None                  |    | None                  |             |
| 15      | 1a | None                  |             |                       |             | None                  |             |                                                                            |             | None                  |    |                       |             |
| 16      | 1a | Q80K (>99%)           | 3 to 5      |                       |             | None                  |             |                                                                            |             | None                  |    |                       |             |
| 17      | 1b | None                  |             |                       |             | None                  |             |                                                                            |             | None                  |    |                       |             |
| 18      | 1a | None                  |             |                       |             | None                  |             |                                                                            |             | None                  |    |                       |             |
| 19      | 1a | None                  |             |                       |             | None                  |             |                                                                            |             | None                  |    |                       |             |
| 20      | 1a | None                  |             |                       |             | None                  |             |                                                                            |             | None                  |    |                       |             |
| 21      | 1a | Q80K (>99%)           | 3 to 5      |                       |             | None                  |             |                                                                            |             | None                  |    |                       |             |

|    |    |                 |        |                 |      |                  |     |                                                                                          |       |      |  |      |  |
|----|----|-----------------|--------|-----------------|------|------------------|-----|------------------------------------------------------------------------------------------|-------|------|--|------|--|
| 22 | 1a | Q80K<br>(>99%)  | 3 to 5 |                 |      | Q30R<br>(2.79%)  | 632 |                                                                                          |       | None |  |      |  |
| 23 | 1a | Q80K<br>(>99%)  | 3 to 5 |                 |      | None             |     |                                                                                          |       | None |  |      |  |
| 24 | 1a | None            |        |                 |      | None             |     |                                                                                          |       | None |  |      |  |
| 25 | 1a | R155K<br>(>99%) | >100   | R155K<br>(>99%) | >100 | L31M<br>(92.91%) | 554 | M28T<br>(1.95%)<br>Q30H<br>(23.09%)<br>Q30R<br>(71.52%)<br>L31M<br>(>99%)<br>Y93C (2.1%) | >1000 | None |  | None |  |

## **APPENDIX: Inclusion/Exclusion Criteria**

1. Participant is eighteen years of age or older at screening
2. Participant is willing to practice either:
  - a) Abstinence from sexual intercourse or
  - b) One or more forms of effective contraception throughout dosing and for 30 day following the last dose. This cannot include hormonal contraceptives for female subjects.
3. Participant has Chronic HCV GT1 infection as documented by at >1 measurement of serum HCV RNA >2,000 IU/mL during screening and at least one of the following:
  - a) Positive anti-HCV antibody, HCV RNA, or
  - b) HCV genotype test result >12 months prior to the baseline (day 0) visit together with current positive HCV RNA and anti-HCV antibody test results or
  - c) Positive HCV RNA test and anti-HCV antibody test results together with a liver biopsy consistent with chronic HCV infection or a liver biopsy performed before enrollment with evidence of chronic hepatitis C infection disease, such as the presence of fibrosis.
4. Participant has advanced liver disease.  
NOTE: In the absence of a definitive diagnosis of presence or absence of cirrhosis, a liver biopsy is required
5. IF Participant has cirrhosis, the participant had liver imaging within 6 months of Day 0 to exclude hepatocellular carcinoma (HCC)
6. Participant is able to communicate effectively with the study investigator and other key personnel
7. Participant is willing to comply with the study restrictions and requirements
8. If opioid-dependent, Participant is participating in a supervised treatment program
9. Participant does not have substance abuse which in the opinion of the investigator is likely to interfere with medication adherence or study compliance
10. Participant has an external primary care doctor (outside of the Clinical Center and the NIH) for their medical management
11. Participant has a healthy status as determined by medical history, physical examination, electrocardiogram (ECG) and clinical laboratory measurements performed at screening
12. Participant is willing to have blood or tissue samples stored for future use to study liver disease and immune function?

13. Participant is willing to undergo HLA typing
14. Participant does not have a positive test at screening for hepatitis B virus (HBV) surface antigen (HBsAg), IgM antibody subclass to hepatitis B core antigen, HBV DNA (if medically indicated) or anti-HIV antibody
15. Participant does not have prior exposure to any direct-acting antivirals for HCV infection.
16. Participant is without a history of any other clinically significant chronic liver disease (e.g. hemochromatosis, autoimmune hepatitis, Wilson's disease,  $\alpha$ 1-antitrypsin deficiency, alcoholic liver disease, >grade 1 stage 1 non-alcoholic steatohepatitis and toxin exposures)
17. Participant denies the use of unlicensed herbal/natural remedies for potential benefit to the liver within 21 Days of Day 0
18. Participant is without a history of ascites, variceal hemorrhage, hepatic encephalopathy, or conditions consistent with decompensated liver disease.
19. Participant at screening or baseline is without an ECG with clinically significant ECG findings  
OR  
Participant is without a personal/first degree relative history of Torsade de pointes?
20. Participant has no abnormal hematological and biochemical parameters at screening, including:
  - a) Neutrophil count  $<750$  cells/mm<sup>3</sup>
  - b) Hemoglobin level  $<9$  g/dL. Or non-normocytic Hgb  $<11$ g/dL in women and  $<12$  g/dL in men requiring additional exploration of medical cause prior to enrollment
  - c) Platelet count  $<50,000$  cells/mm<sup>3</sup>
  - d) Estimated GFR, calculated by the CKD-EPI equation:  $<50$  mL/min/1.73 m<sup>2</sup>
  - e) ALT or AST level  $>10$  times upper limit of normal (ULN)
  - f) Serum lipase level  $>1.5$  times ULN at screening or during the screening period
  - g) Total bilirubin level  $>2.0$  times ULN, except in subjects with Gilbert's syndrome
  - h) Albumin level  $<3.0$  g/dL
21. Participant does not have poorly controlled diabetes mellitus indicated by hemoglobin A1C  $>9\%$  at screening
22. Participant has not donated or lost more than 400mL of blood within 8 weeks prior to the first dose of the study drugs
23. Participant is without a history of major organ transplantation with an existing functional graft
24. No known hypersensitivity to, GS-5885, GS-7977, GS-9669 or formulation recipients.



25. If female, not pregnant or breastfeeding

26. Participant does not have the need for use of the following medications from 21 days prior to the start of study drugs through the end of treatment:

- Hematologic stimulating agents (e.g. erythropoiesis-stimulating agents (ESAs); granulocyte colony stimulating factor (GCSF); thrombopoietin (TPO) mimetics).
- Chronic systemic antineoplastic or immunomodulatory treatment including supraphysiologic doses of immunosuppressants, such as corticosteroids (e.g. prednisone equivalent >10mg/day for > 2 weeks), azathioprine, or monoclonal antibodies (e.g. infliximab).
- Investigational agents or devices for any indication.
- Medications for disease conditions excluded from the protocol (e.g. , active cancer, transplantation) or not listed under the Concomitant Medication section and are disallowed in the study
- Participation in a previous clinical study in which an investigational drug, biologic, or device was received within 12 weeks prior to the first dose of the study drugs.

27. Participant is not co-enrolled in other clinical trials, other than enrollment in observational studies or those evaluating the use of a licensed medication
